# Supplementary material for: Modulation of Pulmonary Toxicity in Metabolic Syndrome Due to Variations in Iron Oxide Nanoparticle-Biocorona Composition
Source: MDPI journal article supplement (doi:10.3390/nano12122022), 2022-06-11

# Modulation of Pulmonary Toxicity in Metabolic Syndrome Due to Variations in Iron Oxide Nanoparticle-Biocorona Composition

Li Xia <sup>1</sup>, Saeed Alqahtani <sup>1,2</sup>, Christina R. Ferreira <sup>3</sup>, Uma K. Aryal <sup>4,5</sup>, Katelyn Biggs <sup>1</sup> and Jonathan H. Shannahan <sup>1,\*</sup>

<sup>1</sup> School of Health Sciences, College of Health and Human Sciences, Purdue University, West Lafayette, IN 47907, USA; xia104@purdue.edu (L,X.); salqaht@purdue.edu (S,A.); biggs23@purdue.edu (K,B.)

<sup>2</sup> Life Science and Environment Research Institute, King Abdulaziz City for Science and Technology (KACST), Riyadh 12354, Saudi Arabia

<sup>3</sup> Purdue Metabolite Profiling Facility, Purdue University, West Lafayette, IN 47907, USA; cferrei@purdue.edu

<sup>4</sup> Purdue Proteomics Facility, Bindley Bioscience Center, Purdue University, West Lafayette, IN 47907, USA; uaryal@purdue.edu

<sup>5</sup> Department of Comparative Pathobiology, Purdue University, West Lafayette, IN 47907, USA

\* Correspondence: jshannah@purdue.edu

**Table S1. Comprehensive list of proteins and relative abundance of all proteins identified in each BC.**

| Protein ID | Gene names                        | Protein names                                                                                                                       | Average Fe <sub>3</sub> O <sub>4</sub> NP-Healthy BC | Average Fe <sub>3</sub> O <sub>4</sub> NP-MetS BC | Fold Change Average Fe <sub>3</sub> O <sub>4</sub> NP-MetS BC | p-value from Core Analysis |
|------------|-----------------------------------|-------------------------------------------------------------------------------------------------------------------------------------|------------------------------------------------------|---------------------------------------------------|---------------------------------------------------------------|----------------------------|
| Q9DBR7     | Ppp1r12a                          | Protein phosphatase 1 regulatory subunit 12A                                                                                        | 3187175,0                                            | 7652625,0                                         | 2,4011                                                        | 0,0033                     |
| P05213     | Tuba1b;Tuba1c;Tuba4a              | Tubulin alpha-1B chain;Tubulin alpha-1C chain;Tubulin alpha-4A chain                                                                | 2434125,0                                            | 9131000,0                                         | 3,7512                                                        | 0,0045                     |
| P68372     | Tubb4b;Tubb4a;Tubb5;Tubb2b;Tubb2a | Tubulin beta-4B chain;Tubulin beta-4A chain;Tubulin beta-5 chain;Tubulin beta-2B chain;Tubulin beta-2A chain                        | 2582655,0                                            | 9651800,0                                         | 3,7372                                                        | 0,0047                     |
| O88456     | Capns1                            | Calpain small subunit 1                                                                                                             | 1201787,5                                            | 3219575,0                                         | 2,6790                                                        | 0,0105                     |
| P14069     | S100a6                            | Protein S100-A6                                                                                                                     | 9217425,0                                            | 19505500,0                                        | 2,1162                                                        | 0,0178                     |
| P06728     | Apoa4                             | Apolipoprotein A-IV                                                                                                                 | 4175300,0                                            | 9194625,0                                         | 2,2021                                                        | 0,0245                     |
| P60710     | Actb;Actg1                        | Actin, cytoplasmic 1;Actin, cytoplasmic 1, N-terminally processed;Actin, cytoplasmic 2;Actin, cytoplasmic 2, N-terminally processed | 29657250,0                                           | 50094000,0                                        | 1,6891                                                        | 0,0295                     |
| Q60605     | Myl6                              | Myosin light polypeptide 6                                                                                                          | 611782,5                                             | 1924900,0                                         | 2,5160                                                        | 0,0313                     |
| P40936     | Inmt                              | Indolethylamine N-methyltransferase                                                                                                 | 6734625,0                                            | 10728150,0                                        | 1,5930                                                        | 0,0477                     |
| P09813     | Apoa2                             | Apolipoprotein A-II;Proapolipoprotein A-II                                                                                          | 10365900,0                                           | 16205250,0                                        | 1,5633                                                        | 0,0545                     |
| P07309     | Ttr                               | Transthyretin                                                                                                                       | 2894125,0                                            | 2150600,0                                         | 0,7431                                                        | 0,0598                     |
| P29788     | Vtn                               | Vitronectin                                                                                                                         | 169771,0                                             | 65805,3                                           | 0,2907                                                        | 0,0658                     |
| Q00896     | Serpina1c;Serpina1a               | Alpha-1-antitrypsin 1-3;Alpha-1-antitrypsin 1-1                                                                                     | 2290953,3                                            | 763240,0                                          | 0,3332                                                        | 0,0663                     |
| Q6GT24     | Prdx6                             | Peroxiredoxin-6                                                                                                                     | 5251375,0                                            | 7082100,0                                         | 1,3486                                                        | 0,0720                     |
| O08553     | Dpysl2                            | Dihydropyrimidinase-related protein 2                                                                                               | 503667,3                                             | 1349372,5                                         | 2,6791                                                        | 0,0727                     |

|            |                                             |                                                                                                                                                                                                                                                                                                                                    |             |             |        |        |
|------------|---------------------------------------------|------------------------------------------------------------------------------------------------------------------------------------------------------------------------------------------------------------------------------------------------------------------------------------------------------------------------------------|-------------|-------------|--------|--------|
| Q06890     | Clu                                         | Clusterin;Clusterin beta chain;Clusterin alpha chain                                                                                                                                                                                                                                                                               | 997750,0    | 635170,0    | 0,6366 | 0,0803 |
| A0A0R4J0I1 | Serpina3k;Serpina3m                         | Serine protease inhibitor A3K;Serine protease inhibitor A3M                                                                                                                                                                                                                                                                        | 3098000,0   | 1139855,0   | 0,3679 | 0,0951 |
| P29699     | Ahsg                                        | Alpha-2-HS-glycoprotein                                                                                                                                                                                                                                                                                                            | 2809045,0   | 837717,5    | 0,2982 | 0,0962 |
| P07724     | Alb                                         | Serum albumin                                                                                                                                                                                                                                                                                                                      | 11311450,0  | 6749400,0   | 0,5967 | 0,1062 |
| Q09XV5     | Chd8                                        | Chromodomain-helicase-DNA-binding protein 8                                                                                                                                                                                                                                                                                        | 1464925,0   | 1521900,0   | 1,0389 | 0,1272 |
| P16858     | Gapdh;Gm3839                                | Glyceraldehyde-3-phosphate dehydrogenase                                                                                                                                                                                                                                                                                           | 732212,5    | 1240837,5   | 1,6946 | 0,1277 |
| P68134     | Acta1;Actc1;Acta2;Actg2                     | Actin, alpha skeletal muscle;Actin, alpha cardiac muscle 1;Actin, aortic smooth muscle;Actin, gamma-enteric smooth muscle                                                                                                                                                                                                          | 530610,0    | 789837,5    | 1,4885 | 0,1348 |
| P10126     | Eef1a1;Eef1a2                               | Elongation factor 1-alpha 1;Elongation factor 1-alpha 2                                                                                                                                                                                                                                                                            | 693116,7    | 1093617,5   | 1,5778 | 0,1440 |
| Q8BHL4     | Gprc5a                                      | Retinoic acid-induced protein 3                                                                                                                                                                                                                                                                                                    | 502403,3    | 272796,7    | 0,5430 | 0,1530 |
| P08074     | Cbr2                                        | Carbonyl reductase [NADPH] 2                                                                                                                                                                                                                                                                                                       | 1895825,0   | 2863525,0   | 1,5104 | 0,1631 |
| O09043     | Napsa                                       | Napsin-A                                                                                                                                                                                                                                                                                                                           | 3905800,0   | 4698200,0   | 1,2029 | 0,2086 |
| Q00897     | Serpina1d                                   | Alpha-1-antitrypsin 1-4                                                                                                                                                                                                                                                                                                            | 6662350,0   | 4884900,0   | 0,7332 | 0,2148 |
| A8DUK4     | Hbbt1; Hbb-b1; Hbb-bs; Hbb-b2               | Hemoglobin subunit beta-1;Hemoglobin subunit beta-2                                                                                                                                                                                                                                                                                | 4589025,0   | 5977875,0   | 1,3026 | 0,2157 |
| P01027     | C3                                          | Complement C3;Complement C3 beta chain;C3-beta-c;Complement C3 alpha chain;C3a anaphylatoxin;Acylation stimulating protein;Complement C3b alpha chain;Complement C3c alpha chain fragment 1;Complement C3dg fragment;Complement C3g fragment;Complement C3d fragment;Complement C3f fragment;Complement C3c alpha chain fragment 2 | 235347,5    | 172255,0    | 0,7319 | 0,2185 |
| P52480     | Pkm                                         | Pyruvate kinase PKM                                                                                                                                                                                                                                                                                                                | 234572,5    | 508190,0    | 2,1665 | 0,2245 |
| P13020     | Gsn                                         | Gelsolin                                                                                                                                                                                                                                                                                                                           | 3748700,0   | 2873100,0   | 0,7664 | 0,2350 |
| P50404     | Sftpd                                       | Pulmonary surfactant-associated protein D                                                                                                                                                                                                                                                                                          | 15711025,0  | 12751000,0  | 0,8116 | 0,2466 |
| P20029     | Hspa5; Hspa8; Hspa2; Hspa1a; Hspa1l; Hspa1b | 78 kDa glucose-regulated protein;Heat shock cognate 71 kDa protein;Heat shock-related 70 kDa protein 2;Heat shock 70 kDa protein 1A;Heat shock 70 kDa protein 1-like;Heat shock 70 kDa protein 1B                                                                                                                                  | 116056,7    | 187155,0    | 1,6126 | 0,2554 |
| Q06318     | Scgb1a1                                     | Uteroglobin                                                                                                                                                                                                                                                                                                                        | 239165000,0 | 269825000,0 | 1,1282 | 0,3335 |

|        |                |                                                                                                                                            |             |             |        |        |
|--------|----------------|--------------------------------------------------------------------------------------------------------------------------------------------|-------------|-------------|--------|--------|
| Q80YC5 | F12            | Coagulation factor XII;Coagulation factor XIIa heavy chain;Coagulation factor XIIa light chain                                             | 1443210,0   | 1241867,5   | 0,8605 | 0,3627 |
| P06684 | C5             | Complement C5;Complement C5 beta chain;Complement C5 alpha chain;C5a anaphylatoxin;Complement C5 alpha chain                               | 794635,0    | 729257,5    | 0,9177 | 0,3991 |
| P97361 | Bpifa1         | BPI fold-containing family A member 1                                                                                                      | 1820085,0   | 2033675,0   | 1,1174 | 0,4105 |
| Q61114 | Bpifb1         | BPI fold-containing family B member 1                                                                                                      | 236383,3    | 229166,7    | 0,9695 | 0,4323 |
| P35242 | Sftpa1         | Pulmonary surfactant-associated protein A                                                                                                  | 117649000,0 | 112480750,0 | 0,9561 | 0,4411 |
| P50405 | Sftpb          | Pulmonary surfactant-associated protein B                                                                                                  | 30340500,0  | 31258750,0  | 1,0303 | 0,4526 |
| Q55Q27 | Sec14l3        | SEC14-like 3 (S, cerevisiae)                                                                                                               | 889800,0    | 876647,5    | 0,9852 | 0,4878 |
| Q99JC1 | Iglc3;Iglc2    | Ig lambda-3 chain C region;Ig lambda-2 chain C region                                                                                      | 2007675,0   |             |        |        |
| D3YY70 | Fbxl12         | F-box/LRR-repeat protein 12                                                                                                                | 4558900,0   |             |        |        |
| Q9ESB3 | Hrg            | Histidine-rich glycoprotein                                                                                                                | 253913,3    |             |        |        |
| P17182 | Eno1;Eno3;Eno2 | Alpha-enolase;Beta-enolase;Gamma-enolase;Enolase                                                                                           |             | 117530,3    |        |        |
| E9Q9F7 | Ccdc146        | Coiled-coil domain-containing 146                                                                                                          |             | 587510,0    |        |        |
| A6H5Z3 | Exoc6b         | Exocyst complex component 6B                                                                                                               |             | 215860,0    |        |        |
| P24549 | Aldh1a1        | Retinal dehydrogenase 1                                                                                                                    |             | 196170,0    |        |        |
| P17563 | Selenbp1       | Selenium-binding protein 1                                                                                                                 |             | 543142,5    |        |        |
| P97821 | Ctsc           | Dipeptidyl peptidase 1;Dipeptidyl peptidase 1 exclusion domain chain;Dipeptidyl peptidase 1 heavy chain;Dipeptidyl peptidase 1 light chain | 410456,7    |             |        |        |
| Q6URW6 | Myh14          | Myosin-14                                                                                                                                  |             | 13683,3     |        |        |
| O35099 | Map3k5         | Mitogen-activated protein kinase kinase kinase 5                                                                                           | 386866,7    |             |        |        |
| P11499 | Hsp90ab1       | Heat shock protein HSP 90-beta                                                                                                             |             | 240463,5    |        |        |
| P56395 | Cyb5a          | Cytochrome b5                                                                                                                              |             | 688900,0    |        |        |
| P33267 | Cyp2f2         | Cytochrome P450 2F2                                                                                                                        |             | 188132,5    |        |        |
| Q61362 | Chi3l1         | Chitinase-3-like protein 1                                                                                                                 |             | 281210,0    |        |        |
| A0JNT9 | Ccdc64         | Bicaudal D-related protein 1                                                                                                               |             | 4425480,0   |        |        |
| Q60692 | Psmb6          | Proteasome subunit beta type-6                                                                                                             |             | 373795,0    |        |        |
| P97298 | Serpinf1       | Pigment epithelium-derived factor                                                                                                          |             | 265670,0    |        |        |
| Q00623 | Apoa1          | Apolipoprotein A-I;Proapolipoprotein A-I;Truncated apolipoprotein A-I                                                                      | 228550,0    |             |        |        |
| O08749 | Dld            | Dihydrolipoyl dehydrogenase, mitochondrial                                                                                                 | 104739,7    |             |        |        |
| Q8BXK9 | Clic5          | Chloride intracellular channel protein 5                                                                                                   | 522456,7    |             |        |        |
| P33622 | Apoc3          | Apolipoprotein C-III                                                                                                                       |             | 967073,3    |        |        |

|        |       |                                |            |
|--------|-------|--------------------------------|------------|
| Q9Z1R9 | Prss1 | Protease, serine 1 (trypsin 1) | 57690000,0 |
|--------|-------|--------------------------------|------------|

**Table S2. Proteins found to associate with Fe<sub>3</sub>O<sub>4</sub> NPs in Healthy and MetS conditions.**

| Shared Proteins ID | Unique Proteins in Fe <sub>3</sub> O <sub>4</sub> NP-Healthy BC | Unique Proteins in Fe <sub>3</sub> O <sub>4</sub> NP-MetS BC |
|--------------------|-----------------------------------------------------------------|--------------------------------------------------------------|
| P35242             | D3YY70                                                          | A0JNT9                                                       |
| Q06318             | O35099                                                          | Q9Z1R9                                                       |
| P60710             | Q99JC1                                                          | E9Q9F7                                                       |
| P50405             | Q8B XK9                                                         | P33267                                                       |
| P07724             | P97821                                                          | P17563                                                       |
| P50404             | Q00623                                                          | P11499                                                       |
| Q9DBR7             | Q9ESB3                                                          | A6H5Z3                                                       |
| Q09XV5             | O0874                                                           | P56395                                                       |
| P06728             | -                                                               | P97298                                                       |
| P13020             | -                                                               | Q60692                                                       |
| P05213             | -                                                               | P33622                                                       |
| P68372             | -                                                               | Q61362                                                       |
| Q00897             | -                                                               | P24549                                                       |
| Q6GT24             | -                                                               | P17182                                                       |
| P40936             | -                                                               | Q6URW6                                                       |
| P09813             | -                                                               | -                                                            |
| P14069             | -                                                               | -                                                            |
| P06684             | -                                                               | -                                                            |
| O09043             | -                                                               | -                                                            |
| A8DUK4             | -                                                               | -                                                            |
| A0A0R4J0I1         | -                                                               | -                                                            |
| P08074             | -                                                               | -                                                            |
| Q80YC5             | -                                                               | -                                                            |
| O08553             | -                                                               | -                                                            |
| O88456             | -                                                               | -                                                            |
| P29699             | -                                                               | -                                                            |
| P07309             | -                                                               | -                                                            |
| Q5SQ27             | -                                                               | -                                                            |
| Q00896             | -                                                               | -                                                            |
| P01027             | -                                                               | -                                                            |
| P10126             | -                                                               | -                                                            |
| P16858             | -                                                               | -                                                            |
| Q06890             | -                                                               | -                                                            |

|        |   |   |
|--------|---|---|
| P97361 | - | - |
| Q60605 | - | - |
| P68134 | - | - |
| P52480 | - | - |
| Q61114 | - | - |
| P20029 | - | - |
| Q8BHL4 | - | - |
| P29788 | - | - |

**Table S3. Comprehensive list of relative abundance differences for all lipids in BCs.**

| Lipid Class                         | Lipid ID                                                | Precursor Ion -><br>Product Ion | Average<br>Fe <sub>3</sub> O <sub>4</sub> NP-<br>Healthy BC | Average<br>Fe <sub>3</sub> O <sub>4</sub> NP-<br>MetS BC | Fold Change<br>Average<br>Fe <sub>3</sub> O <sub>4</sub> NP-<br>Healthy BC | Fold Change<br>Average<br>Fe <sub>3</sub> O <sub>4</sub> NP-<br>MetS BC | p-value<br>from Core<br>Analysis |
|-------------------------------------|---------------------------------------------------------|---------------------------------|-------------------------------------------------------------|----------------------------------------------------------|----------------------------------------------------------------------------|-------------------------------------------------------------------------|----------------------------------|
| Diacylglycerol                      | DG 18:2_16:0                                            | 610,5 -> 313,5                  | 15230                                                       | 17031                                                    | 1                                                                          | 1,1182                                                                  | 0,0138                           |
| Fatty Acid                          | C22:1                                                   | 337,3 -> 337,3                  | 38322                                                       | 33320                                                    | 1                                                                          | 0,8695                                                                  | 0,0138                           |
| Fatty Acid                          | C26:1                                                   | 393,3 -> 393,3                  | 67861                                                       | 53269                                                    | 1                                                                          | 0,7850                                                                  | 0,0185                           |
| Ceramides                           | Cer(d18:2/22:0)                                         | 620,6 -> 262,4                  | 4168                                                        | 3717                                                     | 1                                                                          | 0,8918                                                                  | 0,0215                           |
| Phosphatidylcholines/Sphingomyelins | Lyso PC(15:0)                                           | 482,3168 -> 184,1               | 1838                                                        | 1664                                                     | 1                                                                          | 0,9050                                                                  | 0,0256                           |
| Diacylglycerol                      | DG 16:0_16:1                                            | 584,5 -> 311,5                  | 21734                                                       | 19182                                                    | 1                                                                          | 0,8826                                                                  | 0,0293                           |
| Acyl Carnitines                     | (2E)-hexenedioylcarnitine, O-octanoylcarnitine          | 288,1 -> 85,1                   | 2518                                                        | 1891                                                     | 1                                                                          | 0,7512                                                                  | 0,0310                           |
| Acyl Carnitines                     | (9Z)-3-hydroxydodecenoylcarnitine                       | 358,3 -> 85,1                   | 1623                                                        | 1943                                                     | 1                                                                          | 1,1975                                                                  | 0,0351                           |
| Phosphatidylglycerol                | PG(32:1)                                                | 738,5015 -> 549,5015            | 18197                                                       | 10096                                                    | 1                                                                          | 0,5548                                                                  | 0,0375                           |
| Triglycerides                       | TG 20:0_34:0                                            | 908,9 -> 579,9                  | 2751                                                        | 2152                                                     | 1                                                                          | 0,7823                                                                  | 0,0395                           |
| Phosphatidylglycerol                | PG(32:2)                                                | 736,4859 -> 547,4859            | 2513                                                        | 2270                                                     | 1                                                                          | 0,9031                                                                  | 0,0430                           |
| Acyl Carnitines                     | 2-Hydroxylauroylcarnitine, 3-hydroxydodecanoylcarnitine | 360,3 -> 85,1                   | 4131                                                        | 3531                                                     | 1                                                                          | 0,8548                                                                  | 0,0453                           |
| Phosphatidylglycerol                | PG(30:0)                                                | 712,4859 -> 523,4859            | 4458                                                        | 3397                                                     | 1                                                                          | 0,7619                                                                  | 0,0473                           |
| Fatty Acid                          | C24:1                                                   | 365,3 -> 365,3                  | 42204                                                       | 38552                                                    | 1                                                                          | 0,9135                                                                  | 0,0519                           |
| Acyl Carnitines                     | (9Z)-3-hydroxydodecenoylcarnitine                       | 358,3 -> 197,3                  | 1027                                                        | 868                                                      | 1                                                                          | 0,8455                                                                  | 0,0530                           |
| Fatty Acid                          | C19:0                                                   | 297,3 -> 297,3                  | 198315                                                      | 160945                                                   | 1                                                                          | 0,8116                                                                  | 0,0533                           |
| Acyl Carnitines                     | (5Z,8Z)-tetradecadienoylcarnitine                       | 368,3 -> 207,3                  | 719                                                         | 847                                                      | 1                                                                          | 1,1779                                                                  | 0,0536                           |
| Acyl Carnitines                     | 3-hydroxypalmitoleoylcarnitine, Heptadecanoyl carnitine | 414,3 -> 355,3                  | 981                                                         | 773                                                      | 1                                                                          | 0,7883                                                                  | 0,0547                           |

|                                     |                                                  |                      |        |       |   |        |        |
|-------------------------------------|--------------------------------------------------|----------------------|--------|-------|---|--------|--------|
| Acyl Carnitines                     | O-(17-carboxyheptadecanoyl)carnitine             | 458,3 -> 85,1        | 1110   | 959   | 1 | 0,8637 | 0,0560 |
| Triglycerides                       | TG 20:0_34:1                                     | 906,8 -> 577,8       | 3013   | 2066  | 1 | 0,6857 | 0,0601 |
| Fatty Acid                          | C14:1                                            | 225,2 -> 225,2       | 88080  | 63867 | 1 | 0,7251 | 0,0619 |
| Phosphatidylethanolamine            | PE(32:1)                                         | 690,507 -> 549,507   | 4677   | 3493  | 1 | 0,7467 | 0,0635 |
| Cholesterol Esters                  | 20:0 Cholesteryl ester                           | 698,6471 -> 369,1    | 1292   | 1232  | 1 | 0,9534 | 0,0644 |
| Fatty Acid                          | C26:0                                            | 395,3 -> 395,3       | 56733  | 51048 | 1 | 0,8998 | 0,0660 |
| Acyl Carnitines                     | , TetradecanoylcarnitineO-tetradecanoylcarnitine | 372,3 -> 211,3       | 804    | 903   | 1 | 1,1230 | 0,0732 |
| Triglycerides                       | TG 20:0_40:6                                     | 980,9 -> 651,9       | 2610   | 2090  | 1 | 0,8007 | 0,0762 |
| Fatty Acid                          | C15:1                                            | 239,3 -> 239,3       | 128238 | 81576 | 1 | 0,6361 | 0,0791 |
| Triglycerides                       | TG 18:0_36:3                                     | 902,8 -> 603,8       | 1835   | 2135  | 1 | 1,1637 | 0,0797 |
| Phosphatidylcholines/Sphingomyelins | SM(d18:2/14:0)                                   | 673,5 -> 184,1       | 2076   | 1707  | 1 | 0,8224 | 0,0831 |
| Phosphatidylethanolamine            | PEo(36:5)                                        | 724,5277 -> 583,5277 | 2586   | 2361  | 1 | 0,9130 | 0,0899 |
| Triglycerides                       | TG 18:0_34:3                                     | 874,8 -> 575,8       | 1705   | 1865  | 1 | 1,0943 | 0,0904 |
| Phosphatidylcholines/Sphingomyelins | PC(30:2)                                         | 702,5 -> 184,1       | 2229   | 2004  | 1 | 0,8995 | 0,0904 |
| Acyl Carnitines                     | (5Z,8Z)-tetradecadienoylcarnitine                | 368,3 -> 309,3       | 784    | 722   | 1 | 0,9213 | 0,0974 |
| Phosphatidylcholines/Sphingomyelins | SM(d18:1/14:0)                                   | 675,5 -> 184,1       | 7843   | 3407  | 1 | 0,4344 | 0,0975 |
| Acyl Carnitines                     | cis-5-Tetradecenoylcarnitine                     | 370,3 -> 209,3       | 858    | 746   | 1 | 0,8699 | 0,0980 |
| Ceramides                           | Cer(t18:0/24:0(2OH))                             | 684,7 -> 282,4       | 13855  | 5396  | 1 | 0,3895 | 0,1017 |
| Phosphatidylinositol                | PI(34:5)                                         | 846,4863 -> 569,4863 | 6138   | 4833  | 1 | 0,7875 | 0,1056 |
| Phosphatidylcholines/Sphingomyelins | PCo(38:5)                                        | 794,6 -> 184,1       | 1839   | 2027  | 1 | 1,1023 | 0,1144 |
| Acyl Carnitines                     | (2E,4Z)-decadienoylcarnitine                     | 312,2 -> 151,2       | 1028   | 910   | 1 | 0,8853 | 0,1168 |
| Acyl Carnitines                     | Decanoylcarnitine                                | 316,2 -> 155,2       | 1396   | 1683  | 1 | 1,2056 | 0,1250 |
| Triglycerides                       | TG 18:1_34:3                                     | 874,8 -> 601,8       | 1651   | 1763  | 1 | 1,0680 | 0,1312 |
| Ceramides                           | Cer(d14:1/20:0(2OH))                             | 554,5 -> 208,3       | 4195   | 3845  | 1 | 0,9167 | 0,1312 |
| Ceramides                           | Cer(d14:1/24:0(2OH))                             | 610,6 -> 208,3       | 4644   | 3796  | 1 | 0,8173 | 0,1322 |
| Acyl Carnitines                     | O-behenoylcarnitine                              | 484,4 -> 323,4       | 883    | 809   | 1 | 0,9164 | 0,1330 |
| Acyl Carnitines                     | O-malonylcarnitine,<br>Hydroxybutyrylcarnitine   | 248,1 -> 85,1        | 1069   | 1232  | 1 | 1,1532 | 0,1336 |
| Phosphatidylcholines/Sphingomyelins | Lyso PC(18:1)                                    | 522,3481 -> 184,1    | 2029   | 1899  | 1 | 0,9357 | 0,1354 |
| Phosphatidylethanolamine            | PEo(36:4)                                        | 726,5433 -> 585,5433 | 2560   | 2388  | 1 | 0,9328 | 0,1356 |
| Acyl Carnitines                     | (5Z,8Z)-tetradecadienoylcarnitine                | 368,3 -> 60,1        | 787    | 724   | 1 | 0,9192 | 0,1358 |
| Cholesterol Esters                  | 22:1 Cholesteryl ester                           | 724,6628 -> 369,1    | 1280   | 1184  | 1 | 0,9255 | 0,1417 |
| Diacylglycerol                      | DG 16:1_18:1                                     | 610,5 -> 339,5       | 19396  | 15759 | 1 | 0,8125 | 0,1429 |
| Phosphatidylserine                  | PSp(16:0)                                        | 482,2879 -> 297,2879 | 4197   | 3500  | 1 | 0,8338 | 0,1433 |
| Ceramides                           | Cer(t18:0/20:0(2OH))                             | 628,6 -> 282,4       | 7128   | 5119  | 1 | 0,7181 | 0,1447 |
| Diacylglycerol                      | DG 16:1_16:1                                     | 582,5 -> 311,5       | 15593  | 13456 | 1 | 0,8630 | 0,1453 |

|                                     |                                                                       |                      |        |        |   |        |        |
|-------------------------------------|-----------------------------------------------------------------------|----------------------|--------|--------|---|--------|--------|
| Ceramides                           | Cer(d18:0/20:0(2OH))                                                  | 612,6 -> 266,4       | 13406  | 5897   | 1 | 0,4398 | 0,1461 |
| Diacylglycerol                      | DG 16:0_18:2                                                          | 610,5 -> 337,5       | 15550  | 16186  | 1 | 1,0409 | 0,1512 |
| Diacylglycerol                      | DG 16:1_18:0                                                          | 612,5 -> 341,5       | 20450  | 16023  | 1 | 0,7835 | 0,1571 |
| Diacylglycerol                      | DG 16:0_18:1                                                          | 612,5 -> 339,5       | 27540  | 24618  | 1 | 0,8939 | 0,1596 |
| Phosphatidylcholines/Sphingomyelins | PC(36:8), PCo(36:1)                                                   | 774,5 -> 184,1       | 1987   | 2191   | 1 | 1,1030 | 0,1598 |
| Phosphatidylglycerol                | PG(34:4)                                                              | 760,4859 -> 571,4859 | 51012  | 38071  | 1 | 0,7463 | 0,1642 |
| Acyl Carnitines                     | 2-Hydroxy-lauroylcarnitine, 3-hydroxydodecanoylcarnitine              | 360,3 -> 199,3       | 866    | 788    | 1 | 0,9101 | 0,1672 |
| Phosphatidylcholines/Sphingomyelins | Lyso PC(16:0)                                                         | 496,3325 -> 184,1    | 3141   | 2734   | 1 | 0,8704 | 0,1697 |
| Phosphatidylglycerol                | PG(34:0)                                                              | 768,5485 -> 579,5485 | 7276   | 5906   | 1 | 0,8118 | 0,1702 |
| Phosphatidylcholines/Sphingomyelins | PCo(34:3)                                                             | 742,6 -> 184,1       | 1938   | 1810   | 1 | 0,9339 | 0,1705 |
| Triglycerides                       | TG 18:2_34:1                                                          | 874,8 -> 577,8       | 1989   | 2143   | 1 | 1,0771 | 0,1757 |
| Ceramides                           | Cer(d18:0/22:0)                                                       | 624,6 -> 266,4       | 4851   | 4582   | 1 | 0,9446 | 0,1758 |
| Triglycerides                       | TG 18:0_36:4                                                          | 900,8 -> 601,8       | 1648   | 1739   | 1 | 1,0548 | 0,1764 |
| Phosphatidylglycerol                | PGo(34:0)                                                             | 754,5692 -> 565,5692 | 2384   | 2273   | 1 | 0,9533 | 0,1782 |
| Acyl Carnitines                     | (2E,5Z,7E)-decatrienoylcarnitine                                      | 310,2 -> 251,2       | 669    | 723    | 1 | 1,0815 | 0,1784 |
| Acyl Carnitines                     | O-(11-carboxyundecanoyl)carnitine                                     | 374,2 -> 213,2       | 1112   | 1006   | 1 | 0,9042 | 0,1796 |
| Triglycerides                       | TG 18:0_30:1                                                          | 822,8 -> 523,8       | 1582   | 1762   | 1 | 1,1143 | 0,1820 |
| Phosphatidylethanolamine            | PE(38:6)                                                              | 764,5226 -> 623,5226 | 4488   | 4927   | 1 | 1,0977 | 0,1825 |
| Phosphatidylcholines/Sphingomyelins | SM(d18:0/14:0)                                                        | 677,6 -> 184,1       | 2286   | 1930   | 1 | 0,8443 | 0,1854 |
| Triglycerides                       | TG 18:1_34:2                                                          | 876,8 -> 603,8       | 1763   | 2000   | 1 | 1,1344 | 0,1893 |
| Cholesterol Esters                  | 18:0 Cholesteryl ester                                                | 670,6158 -> 369,1    | 1566   | 1477   | 1 | 0,9430 | 0,1949 |
| Phosphatidylglycerol                | PG(34:1)                                                              | 766,5328 -> 577,5328 | 62595  | 47633  | 1 | 0,7610 | 0,1957 |
| Diacylglycerol                      | DG 16:0_18:0                                                          | 614,5 -> 341,5       | 109461 | 103456 | 1 | 0,9451 | 0,1965 |
| Triglycerides                       | TG 18:1_32:3                                                          | 848,8 -> 575,8       | 1722   | 1892   | 1 | 1,0988 | 0,1970 |
| Acyl Carnitines                     | (4Z)-decenoylcarnitine, 9-Decenoylcarnitine, CIS-4-DECENOYL CARNITINE | 314,2 -> 85,1        | 1401   | 1277   | 1 | 0,9114 | 0,2013 |
| Diacylglycerol                      | DG 18:0_16:0                                                          | 614,5 -> 313,5       | 115684 | 108822 | 1 | 0,9407 | 0,2021 |
| Phosphatidylcholines/Sphingomyelins | PC(30:1)                                                              | 704,5 -> 184,1       | 10324  | 8239   | 1 | 0,7980 | 0,2031 |
| Phosphatidylcholines/Sphingomyelins | PCo(32:2)                                                             | 716,6 -> 184,1       | 2879   | 2559   | 1 | 0,8889 | 0,2082 |
| Phosphatidylglycerol                | PG(34:5)                                                              | 758,4702 -> 569,4702 | 9356   | 7657   | 1 | 0,8184 | 0,2105 |
| Phosphatidylethanolamine            | PE(34:4)                                                              | 712,4913 -> 571,4913 | 61381  | 47912  | 1 | 0,7806 | 0,2116 |
| Acyl Carnitines                     | 3-hydroxyarachidonoylcarnitine                                        | 464,3 -> 303,3       | 680    | 648    | 1 | 0,9530 | 0,2193 |
| Ceramides                           | Cer(d18:1/16:0)                                                       | 538,5 -> 264,3       | 4136   | 3958   | 1 | 0,9571 | 0,2197 |
| Triglycerides                       | TG 16:0_34:4                                                          | 846,8 -> 575,8       | 1609   | 1823   | 1 | 1,1335 | 0,2201 |
| Acyl Carnitines                     | Decanoylcarnitine                                                     | 316,2 -> 257,2       | 1000   | 1165   | 1 | 1,1651 | 0,2203 |

|                                     |                                                                     |                      |        |        |   |        |        |
|-------------------------------------|---------------------------------------------------------------------|----------------------|--------|--------|---|--------|--------|
| Acyl Carnitines                     | (2E)-hexenedioylcarnitine, O-octanoylcarnitine                      | 288,1 -> 127,1       | 1020   | 944    | 1 | 0,9255 | 0,2247 |
| Triglycerides                       | TG 16:0_32:1                                                        | 822,8 -> 551,8       | 1786   | 2109   | 1 | 1,1810 | 0,2256 |
| Acyl Carnitines                     | 2-Hydroxymyristoylcarnitine, 3-hydroxytetradecanoylcarnitine        | 388,3 -> 227,3       | 841    | 779    | 1 | 0,9267 | 0,2265 |
| Phosphatidylethanolamine            | PE(34:3)                                                            | 714,507 -> 573,507   | 3960   | 3539   | 1 | 0,8936 | 0,2276 |
| Phosphatidylinositol                | PI(34:4)                                                            | 848,5019 -> 571,5019 | 25052  | 20112  | 1 | 0,8028 | 0,2277 |
| Phosphatidylcholines/Sphingomyelins | PC(30:0)                                                            | 706,5 -> 184,1       | 160534 | 122542 | 1 | 0,7633 | 0,2304 |
| Phosphatidylcholines/Sphingomyelins | SM(d18:1/18:1)9Z))                                                  | 729,6 -> 184,1       | 2441   | 2671   | 1 | 1,0943 | 0,2309 |
| Acyl Carnitines                     | 3-hydroxylinoleoylcarnitine,                                        | 440,3 -> 381,3       | 846    | 784    | 1 | 0,9268 | 0,2342 |
| Diacylglycerol                      | DG 16:1_16:0                                                        | 584,5 -> 313,5       | 20043  | 18833  | 1 | 0,9396 | 0,2344 |
| Phosphatidylcholines/Sphingomyelins | Lyso PC(3:0)                                                        | 314,129 -> 184,1     | 1725   | 1679   | 1 | 0,9732 | 0,2346 |
| Triglycerides                       | TG 18:1_32:2                                                        | 850,8 -> 577,8       | 2229   | 2619   | 1 | 1,1747 | 0,2367 |
| Phosphatidylglycerol                | PG(32:0)                                                            | 740,5172 -> 551,5172 | 27774  | 22452  | 1 | 0,8084 | 0,2406 |
| Phosphatidylserine                  | PS(34:3)                                                            | 758,4968 -> 573,4968 | 2724   | 2576   | 1 | 0,9459 | 0,2445 |
| Acyl Carnitines                     | O-(17-carboxyheptadecanoyl)carnitine                                | 458,3 -> 144,1       | 692    | 721    | 1 | 1,0425 | 0,2466 |
| Acyl Carnitines                     | 2-ethylacryloylcarnitine, Tiglylcarnitine                           | 244,1 -> 83,1        | 25502  | 32922  | 1 | 1,2910 | 0,2476 |
| Phosphatidylcholines/Sphingomyelins | PC(36:0), PCp(38:6)                                                 | 790,6 -> 184,1       | 2578   | 2755   | 1 | 1,0688 | 0,2536 |
| Triglycerides                       | TG 18:0_34:2                                                        | 876,8 -> 577,8       | 1956   | 2164   | 1 | 1,1063 | 0,2549 |
| Phosphatidylcholines/Sphingomyelins | PCo(38:6)                                                           | 792,6 -> 184,1       | 2378   | 2695   | 1 | 1,1333 | 0,2550 |
| Acyl Carnitines                     | , TetradecanoylcarnitineO-tetradecanoylcarnitine                    | 372,3 -> 313,3       | 717    | 755    | 1 | 1,0522 | 0,2565 |
| Acyl Carnitines                     | Stearidonyl carnitine                                               | 420,3 -> 144,1       | 700    | 667    | 1 | 0,9526 | 0,2615 |
| Acyl Carnitines                     | (2E,4Z)-decadienoylcarnitine                                        | 312,2 -> 85,1        | 1013   | 1108   | 1 | 1,0939 | 0,2637 |
| Phosphatidylethanolamine            | PE(34:2)                                                            | 716,5226 -> 575,5226 | 5775   | 5128   | 1 | 0,8879 | 0,2638 |
| Phosphatidylcholines/Sphingomyelins | SM(d16:1/24:1)                                                      | 785,6 -> 184,1       | 4645   | 4075   | 1 | 0,8773 | 0,2654 |
| Phosphatidylethanolamine            | PE(34:5)                                                            | 710,4757 -> 569,4757 | 10993  | 9374   | 1 | 0,8527 | 0,2665 |
| Phosphatidylcholines/Sphingomyelins | PC(38:6)                                                            | 806,6 -> 184,1       | 23709  | 30002  | 1 | 1,2654 | 0,2720 |
| Phosphatidylethanolamine            | PE(34:1)                                                            | 718,5383 -> 577,5383 | 7360   | 7962   | 1 | 1,0817 | 0,2726 |
| Phosphatidylcholines/Sphingomyelins | PC(38:7), PCo(38:0)                                                 | 804,6 -> 184,1       | 2063   | 2208   | 1 | 1,0701 | 0,2740 |
| Phosphatidylcholines/Sphingomyelins | Lyso PC(6:0)                                                        | 356,176 -> 184,1     | 2751   | 2505   | 1 | 0,9104 | 0,2759 |
| Acyl Carnitines                     | 12-Hydroxy-12-octadecanoylcarnitine, 3-hydroxyoctadecanoylcarnitine | 444,4 -> 283,4       | 777    | 739    | 1 | 0,9503 | 0,2763 |
| Phosphatidylcholines/Sphingomyelins | PCo(34:4)                                                           | 740,6 -> 184,1       | 20624  | 17231  | 1 | 0,8355 | 0,2819 |



|                                     |                                                          |                      |        |        |   |        |        |
|-------------------------------------|----------------------------------------------------------|----------------------|--------|--------|---|--------|--------|
| Acyl Carnitines                     | O-palmitoleoylcarnitine, trans-Hexadec-2-enoyl carnitine | 398,3 -> 339,3       | 1281   | 1463   | 1 | 1,1417 | 0,2847 |
| Acyl Carnitines                     | 2-ethylacryloylcarnitine, Tiglylcarnitine                | 244,1 -> 85,1        | 2320   | 2678   | 1 | 1,1542 | 0,2853 |
| Phosphatidylcholines/Sphingomyelins | SM(d18:1/24:0)                                           | 815,7 -> 184,1       | 2541   | 2402   | 1 | 0,9453 | 0,2901 |
| Phosphatidylcholines/Sphingomyelins | PC(34:2)                                                 | 758,6 -> 184,1       | 103035 | 128550 | 1 | 1,2476 | 0,2902 |
| Phosphatidylcholines/Sphingomyelins | PCo(34:0)                                                | 748,6 -> 184,1       | 6446   | 7603   | 1 | 1,1795 | 0,2927 |
| Phosphatidylserine                  | PS(34:4)                                                 | 756,4811 -> 571,4811 | 21482  | 18308  | 1 | 0,8522 | 0,2927 |
| Phosphatidylglycerol                | PGo(32:0)                                                | 726,5379 -> 537,5379 | 2290   | 2360   | 1 | 1,0309 | 0,2935 |
| Acyl Carnitines                     | (7Z,10Z)-hexadecadienoylcarnitine                        | 396,3 -> 85,1        | 1079   | 1148   | 1 | 1,0638 | 0,2959 |
| Acyl Carnitines                     | Valerylcarnitine, Isovalerylcarnitine                    | 246,2 -> 187,2       | 843    | 811    | 1 | 0,9626 | 0,2966 |
| Acyl Carnitines                     | cis-5-Tetradecenoylcarnitine                             | 370,3 -> 311,3       | 704    | 731    | 1 | 1,0393 | 0,2978 |
| Phosphatidylcholines/Sphingomyelins | Lyso PC(16:1)                                            | 494,3168 -> 184,1    | 1820   | 1760   | 1 | 0,9668 | 0,2987 |
| Phosphatidylcholines/Sphingomyelins | SM(d18:0/16:0)                                           | 705,6 -> 184,1       | 5901   | 5175   | 1 | 0,8771 | 0,2997 |
| Phosphatidylcholines/Sphingomyelins | SM(d18:1/20:0)                                           | 759,6 -> 184,1       | 41549  | 50941  | 1 | 1,2260 | 0,2997 |
| Phosphatidylcholines/Sphingomyelins | Lyso PC(18:2)                                            | 520,3325 -> 184,1    | 1770   | 1711   | 1 | 0,9669 | 0,3036 |
| Acyl Carnitines                     | (2E,5Z,7E)-decatrienoylcarnitine                         | 310,2 -> 85,1        | 1507   | 1648   | 1 | 1,0931 | 0,3060 |
| Acyl Carnitines                     | cis-5-Tetradecenoylcarnitine                             | 370,3 -> 85,1        | 1344   | 1425   | 1 | 1,0605 | 0,3078 |
| Triglycerides                       | TG 16:0_32:3                                             | 818,8 -> 547,8       | 1627   | 1709   | 1 | 1,0507 | 0,3115 |
| Phosphatidylcholines/Sphingomyelins | PC(36:7), PCo(36:0)                                      | 776,5 -> 184,1       | 1803   | 1862   | 1 | 1,0328 | 0,3134 |
| Triglycerides                       | TG 18:0_32:2                                             | 850,8 -> 551,8       | 1847   | 1979   | 1 | 1,0713 | 0,3178 |
| Phosphatidylcholines/Sphingomyelins | PC(32:5)                                                 | 724,5 -> 184,1       | 2252   | 2138   | 1 | 0,9495 | 0,3188 |
| Phosphatidylglycerol                | PG(36:5)                                                 | 786,5015 -> 597,5015 | 2407   | 2331   | 1 | 0,9683 | 0,3209 |
| Phosphatidylinositol                | PI(34:3)                                                 | 850,5176 -> 573,5176 | 2690   | 2586   | 1 | 0,9616 | 0,3211 |
| Acyl Carnitines                     | Propenoylcarnitine                                       | 216,1 -> 55,1        | 1299   | 1388   | 1 | 1,0687 | 0,3222 |
| Phosphatidylcholines/Sphingomyelins | SM(d18:2/22:1)                                           | 783,6 -> 184,1       | 16783  | 19832  | 1 | 1,1817 | 0,3251 |
| Phosphatidylinositol                | PI(38:6)                                                 | 900,5332 -> 623,5332 | 2668   | 2596   | 1 | 0,9730 | 0,3279 |
| Phosphatidylethanolamine            | PE(36:4)                                                 | 740,5226 -> 599,5226 | 6001   | 6653   | 1 | 1,1087 | 0,3286 |
| Phosphatidylcholines/Sphingomyelins | PC(34:5)                                                 | 752,5 -> 184,1       | 12513  | 10893  | 1 | 0,8706 | 0,3296 |
| Phosphatidylcholines/Sphingomyelins | PC(36:4)                                                 | 782,6 -> 184,1       | 37698  | 44701  | 1 | 1,1858 | 0,3298 |
| Phosphatidylcholines/Sphingomyelins | PCo(36:2)                                                | 772,6 -> 184,1       | 2010   | 2103   | 1 | 1,0466 | 0,3305 |
| Phosphatidylglycerol                | PG(36:4)                                                 | 788,5172 -> 599,5172 | 10576  | 9413   | 1 | 0,8901 | 0,3325 |
| Phosphatidylglycerol                | PG(38:6)                                                 | 812,5172 -> 623,5172 | 7131   | 6453   | 1 | 0,9050 | 0,3331 |
| Acyl Carnitines                     | Butenylcarnitine                                         | 230,1 -> 69,1        | 1120   | 1184   | 1 | 1,0569 | 0,3333 |
| Phosphatidylcholines/Sphingomyelins | PCo(36:5)                                                | 766,6 -> 184,1       | 2200   | 2110   | 1 | 0,9592 | 0,3337 |
| Triglycerides                       | TG 16:0_34:3                                             | 848,8 -> 577,8       | 1850   | 1962   | 1 | 1,0607 | 0,3370 |

|                                     |                                                 |                      |        |        |   |        |        |
|-------------------------------------|-------------------------------------------------|----------------------|--------|--------|---|--------|--------|
| Phosphatidylcholines/Sphingomyelins | PC(40:7), PCo(40:0)                             | 832,6 -> 184,1       | 2038   | 1952   | 1 | 0,9575 | 0,3412 |
| Phosphatidylcholines/Sphingomyelins | PC(38:4)                                        | 810,6 -> 184,1       | 7948   | 9075   | 1 | 1,1418 | 0,3418 |
| Phosphatidylcholines/Sphingomyelins | SM(d18:0/18:0)                                  | 733,6 -> 184,1       | 259582 | 224869 | 1 | 0,8663 | 0,3435 |
| Phosphatidylcholines/Sphingomyelins | PC(34:4)                                        | 754,5 -> 184,1       | 70943  | 62017  | 1 | 0,8742 | 0,3475 |
| Acyl Carnitines                     | (5Z,8Z)-tetradecadienoylcarnitine               | 368,3 -> 85,1        | 1335   | 1398   | 1 | 1,0473 | 0,3481 |
| Phosphatidylserine                  | PS(34:5)                                        | 754,4655 -> 569,4655 | 5372   | 4978   | 1 | 0,9267 | 0,3497 |
| Phosphatidylcholines/Sphingomyelins | PC(32:1)                                        | 732,6 -> 184,1       | 676960 | 590445 | 1 | 0,8722 | 0,3504 |
| Phosphatidylcholines/Sphingomyelins | PC(38:5)                                        | 808,6 -> 184,1       | 9363   | 10596  | 1 | 1,1317 | 0,3529 |
| Phosphatidylcholines/Sphingomyelins | Lyso PC(10:0)                                   | 412,2386 -> 184,1    | 1739   | 1785   | 1 | 1,0264 | 0,3534 |
| Triglycerides                       | TG 16:0_32:2                                    | 820,8 -> 549,8       | 1938   | 2131   | 1 | 1,0992 | 0,3569 |
| Phosphatidylcholines/Sphingomyelins | PCo(32:1)                                       | 718,6 -> 184,1       | 11742  | 10487  | 1 | 0,8931 | 0,3600 |
| Phosphatidylcholines/Sphingomyelins | SM(d16:1/22:1)                                  | 757,6 -> 184,1       | 5109   | 5636   | 1 | 1,1032 | 0,3603 |
| Phosphatidylcholines/Sphingomyelins | PC(36:5)                                        | 780,6 -> 184,1       | 3572   | 3824   | 1 | 1,0706 | 0,3630 |
| Phosphatidylcholines/Sphingomyelins | PC(36:3)                                        | 784,6 -> 184,1       | 10709  | 9698   | 1 | 0,9056 | 0,3690 |
| Diacylglycerol                      | DG 18:0_18:0                                    | 642,6 -> 341,6       | 432619 | 419881 | 1 | 0,9706 | 0,3703 |
| Phosphatidylcholines/Sphingomyelins | SM(d18:2/20:1)                                  | 755,6 -> 184,1       | 16700  | 15061  | 1 | 0,9019 | 0,3705 |
| Phosphatidylglycerol                | PG(36:2)                                        | 792,5485 -> 603,5485 | 4401   | 4132   | 1 | 0,9387 | 0,3709 |
| Acyl Carnitines                     | (11Z,14Z)-eicosadienoylcarnitine                | 452,4 -> 85,1        | 1342   | 1399   | 1 | 1,0424 | 0,3779 |
| Phosphatidylcholines/Sphingomyelins | PC(40:6)                                        | 834,6 -> 184,1       | 4176   | 4511   | 1 | 1,0801 | 0,3798 |
| Acyl Carnitines                     | (9Z)-3-hydroxyoctadecenoylcarnitine             | 442,3 -> 85,1        | 1036   | 996    | 1 | 0,9612 | 0,3820 |
| Phosphatidylcholines/Sphingomyelins | SM(d18:2/24:1)                                  | 811,7 -> 184,1       | 5086   | 5491   | 1 | 1,0796 | 0,3824 |
| Acyl Carnitines                     | (5Z,8Z)-3-hydroxytetradecadienoylcarnitine      | 384,3 -> 223,3       | 745    | 760    | 1 | 1,0207 | 0,3828 |
| Acyl Carnitines                     | (2E,5Z,7E)-decatrienoylcarnitine                | 310,2 -> 149,2       | 1795   | 1693   | 1 | 0,9433 | 0,3881 |
| Phosphatidylcholines/Sphingomyelins | PC(36:2)                                        | 786,6 -> 184,1       | 7331   | 6847   | 1 | 0,9340 | 0,3889 |
| Triglycerides                       | TG 18:0_32:4                                    | 846,8 -> 547,8       | 1624   | 1659   | 1 | 1,0219 | 0,3906 |
| Phosphatidylcholines/Sphingomyelins | PC(40:4)                                        | 838,6 -> 184,1       | 1855   | 1887   | 1 | 1,0176 | 0,3909 |
| Triglycerides                       | TG 18:1_34:1                                    | 878,8 -> 605,8       | 1776   | 1740   | 1 | 0,9798 | 0,3932 |
| Acyl Carnitines                     | (9Z,12Z,15Z)-3-hydroxyoctadecatrienoylcarnitine | 438,3 -> 277,3       | 704    | 692    | 1 | 0,9826 | 0,3950 |
| Phosphatidylcholines/Sphingomyelins | PC(38:3)                                        | 812,6 -> 184,1       | 2934   | 3069   | 1 | 1,0460 | 0,3951 |
| Acyl Carnitines                     | O-(13-carboxytridecanoyl)carnitine              | 402,3 -> 241,3       | 728    | 741    | 1 | 1,0170 | 0,3991 |
| Phosphatidylcholines/Sphingomyelins | PCp(36:5)                                       | 764,6 -> 184,1       | 3310   | 3171   | 1 | 0,9580 | 0,3995 |
| Triglycerides                       | TG 18:1_30:1                                    | 822,8 -> 549,8       | 2057   | 2179   | 1 | 1,0593 | 0,4103 |
| Phosphatidylglycerol                | PG(38:5)                                        | 814,5328 -> 625,5328 | 4850   | 4631   | 1 | 0,9550 | 0,4105 |

|                                     |                                                         |                      |         |         |   |        |        |
|-------------------------------------|---------------------------------------------------------|----------------------|---------|---------|---|--------|--------|
| Acyl Carnitines                     | O-oleoylcarnitine, Elaidic carnitine                    | 426,4 -> 85,1        | 1234    | 1258    | 1 | 1,0191 | 0,4108 |
| Phosphatidylserine                  | PSo(16:0)                                               | 484,3035 -> 299,3035 | 2720    | 2676    | 1 | 0,9838 | 0,4110 |
| Phosphatidylcholines/Sphingomyelins | PCo(32:0)                                               | 720,6 -> 184,1       | 18734   | 17416   | 1 | 0,9296 | 0,4111 |
| Phosphatidylglycerol                | PG(38:4)                                                | 816,5485 -> 627,5485 | 3528    | 3414    | 1 | 0,9677 | 0,4130 |
| Phosphatidylcholines/Sphingomyelins | PCo(34:2)                                               | 744,6 -> 184,1       | 3344    | 3205    | 1 | 0,9586 | 0,4139 |
| Diacylglycerol                      | DG 16:0_16:0                                            | 586,5 -> 313,5       | 44194   | 45139   | 1 | 1,0214 | 0,4142 |
| Phosphatidylcholines/Sphingomyelins | PC(32:2)                                                | 730,5 -> 184,1       | 16722   | 15622   | 1 | 0,9342 | 0,4154 |
| Phosphatidylinositol                | PI(36:4)                                                | 876,5332 -> 599,5332 | 2785    | 2729    | 1 | 0,9798 | 0,4168 |
| Phosphatidylcholines/Sphingomyelins | SM(d18:1/16:0)                                          | 703,6 -> 184,1       | 6181    | 5907    | 1 | 0,9557 | 0,4196 |
| Phosphatidylcholines/Sphingomyelins | PC(34:3)                                                | 756,6 -> 184,1       | 10644   | 10089   | 1 | 0,9479 | 0,4282 |
| Phosphatidylcholines/Sphingomyelins | PCo(36:4)                                               | 768,6 -> 184,1       | 2286    | 2242    | 1 | 0,9807 | 0,4323 |
| Phosphatidylcholines/Sphingomyelins | SM(d18:0/20:0)                                          | 761,6 -> 184,1       | 80718   | 76141   | 1 | 0,9433 | 0,4325 |
| Phosphatidylcholines/Sphingomyelins | PC(32:3)                                                | 728,5 -> 184,1       | 3227    | 3134    | 1 | 0,9714 | 0,4333 |
| Phosphatidylcholines/Sphingomyelins | SM(d16:1/24:0)                                          | 787,7 -> 184,1       | 4159    | 4272    | 1 | 1,0272 | 0,4334 |
| Phosphatidylcholines/Sphingomyelins | PC(32:0), PCp(32:4)                                     | 734,6 -> 184,1       | 1009132 | 1072711 | 1 | 1,0630 | 0,4354 |
| Acyl Carnitines                     | Stearidonyl carnitine                                   | 420,3 -> 85,1        | 1701    | 1685    | 1 | 0,9906 | 0,4372 |
| Phosphatidylcholines/Sphingomyelins | PC(40:5)                                                | 836,6 -> 184,1       | 2363    | 2328    | 1 | 0,9853 | 0,4465 |
| Phosphatidylcholines/Sphingomyelins | PCo(38:4)                                               | 796,6 -> 184,1       | 1943    | 1965    | 1 | 1,0113 | 0,4498 |
| Phosphatidylinositol                | PIo(20:5)                                               | 632,3869 -> 355,3869 | 2726    | 2701    | 1 | 0,9908 | 0,4520 |
| Phosphatidylcholines/Sphingomyelins | SM(d16:1/18:1)                                          | 701,6 -> 184,1       | 2715    | 2673    | 1 | 0,9849 | 0,4539 |
| Phosphatidylglycerol                | PG(36:1)                                                | 794,5641 -> 605,5641 | 3248    | 3204    | 1 | 0,9865 | 0,4546 |
| Phosphatidylcholines/Sphingomyelins | PC(34:6)                                                | 750,5 -> 184,1       | 2163    | 2139    | 1 | 0,9890 | 0,4555 |
| Ceramides                           | Cer(d18:0/24:0)                                         | 652,7 -> 266,4       | 6111    | 5988    | 1 | 0,9798 | 0,4567 |
| Phosphatidylglycerol                | PG(34:2)                                                | 764,5172 -> 575,5172 | 31632   | 30531   | 1 | 0,9652 | 0,4569 |
| Acyl Carnitines                     | (2E)-octenoylcarnitine, 2-octenoyl-L-carnitine          | 286,2 -> 144,1       | 685     | 678     | 1 | 0,9901 | 0,4581 |
| Phosphatidylglycerol                | PG(34:3)                                                | 762,5015 -> 573,5015 | 4479    | 4397    | 1 | 0,9815 | 0,4624 |
| Acyl Carnitines                     | Propionylcarnitine                                      | 218,1 -> 57,1        | 876     | 870     | 1 | 0,9930 | 0,4637 |
| Phosphatidylcholines/Sphingomyelins | Lyso PC(19:3)                                           | 532,3325 -> 184,1    | 2291    | 2268    | 1 | 0,9900 | 0,4644 |
| Diacylglycerol                      | DG 18:1_16:0                                            | 612,5 -> 313,5       | 21215   | 21364   | 1 | 1,0070 | 0,4645 |
| Phosphatidylcholines/Sphingomyelins | Lyso PC(18:0)                                           | 524,3638 -> 184,1    | 2799    | 2759    | 1 | 0,9857 | 0,4646 |
| Acyl Carnitines                     | 3-hydroxypalmitoleoylcarnitine, Heptadecanoyl carnitine | 414,3 -> 253,3       | 770     | 764     | 1 | 0,9914 | 0,4655 |
| Phosphatidylcholines/Sphingomyelins | PC(34:1)                                                | 760,6 -> 184,1       | 202811  | 208374  | 1 | 1,0274 | 0,4702 |
| Phosphatidylglycerol                | PG(36:3)                                                | 790,5328 -> 601,5328 | 4043    | 4093    | 1 | 1,0123 | 0,4716 |
| Phosphatidylcholines/Sphingomyelins | PCo(34:1)                                               | 746,6 -> 184,1       | 9788    | 9611    | 1 | 0,9820 | 0,4754 |

|                                     |                                                                       |                |       |       |   |        |        |
|-------------------------------------|-----------------------------------------------------------------------|----------------|-------|-------|---|--------|--------|
| Acyl Carnitines                     | (4Z)-decenoylcarnitine, 9-Decenoylcarnitine, CIS-4-DECENOYL CARNITINE | 314,2 -> 255,2 | 862   | 869   | 1 | 1,0082 | 0,4791 |
| Acyl Carnitines                     | 2-ethylacryloylcarnitine, Tiglylcarnitine                             | 244,1 -> 60,1  | 894   | 898   | 1 | 1,0054 | 0,4815 |
| Phosphatidylcholines/Sphingomyelins | PC(34:0)                                                              | 762,6 -> 184,1 | 30854 | 31254 | 1 | 1,0130 | 0,4842 |
| Acyl Carnitines                     | Palmitoylcarnitine, (5Z)-13-carboxytridec-5-enoylcarnitine            | 400,3 -> 239,3 | 756   | 759   | 1 | 1,0049 | 0,4846 |
| Triglycerides                       | TG 16:1_36:0                                                          | 878,8 -> 577,8 | 1670  | 1675  | 1 | 1,0031 | 0,4856 |
| Triglycerides                       | TG 18:1_30:0                                                          | 824,8 -> 551,8 | 2363  | 2359  | 1 | 0,9982 | 0,4933 |
| Acyl Carnitines                     | Acetyl-carnitine                                                      | 204,1 -> 43,1  | 1829  | 1833  | 1 | 1,0019 | 0,4941 |
| Phosphatidylcholines/Sphingomyelins | SM(d18:1/18:0)                                                        | 731,6 -> 184,1 | 11772 | 11795 | 1 | 1,0020 | 0,4959 |

**Figure S1. (a-h) 1h Total protein for (a) STAT3 & p-STAT3 (b) p38 & p-p38 (c) NF- $\kappa$ B & p-NF- $\kappa$ B (d) ERK & p-ERK. 24h Total protein for (e) STAT3 & p-STAT3 (f) p38 & p-p38 (g) ERK & p-ERK (h) NF- $\kappa$ B & p-NF- $\kappa$ B.**

1h Total protein for:

a) STAT3 & p-STAT3

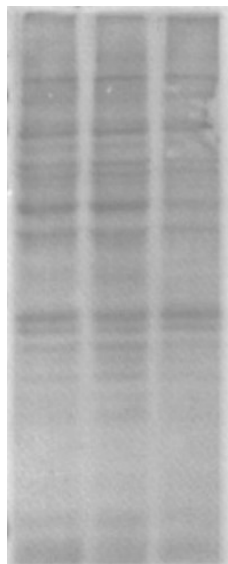

b) p38 & p-p38

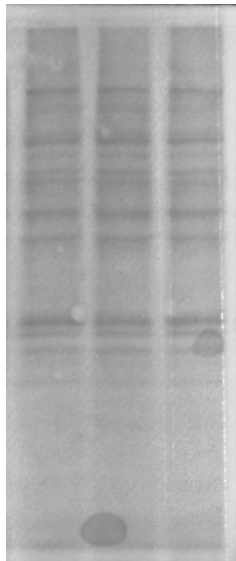

c) NF- $\kappa$ B & p-NF- $\kappa$ B

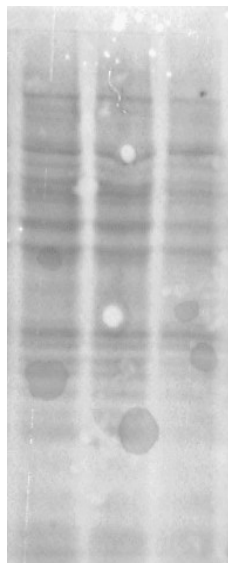

d) ERK & p-ERK

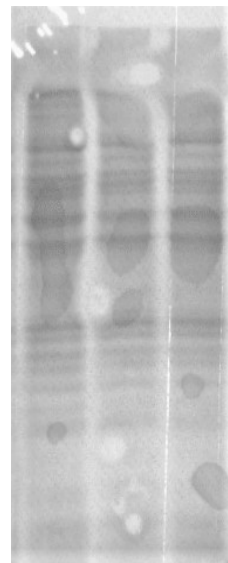

24h Total protein for:

e) STAT3 & p-STAT3

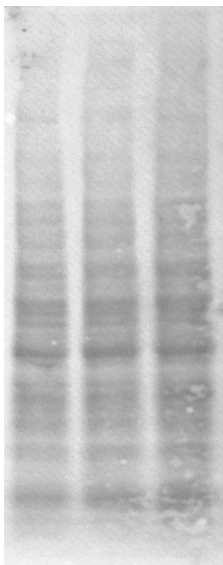

f) p38 & p-p38

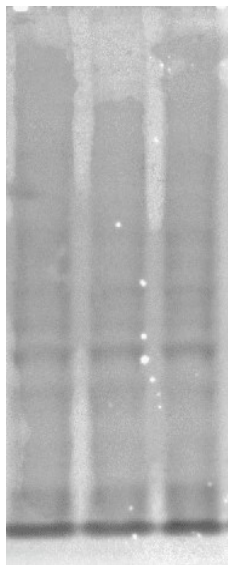

g) ERK & p-ERK

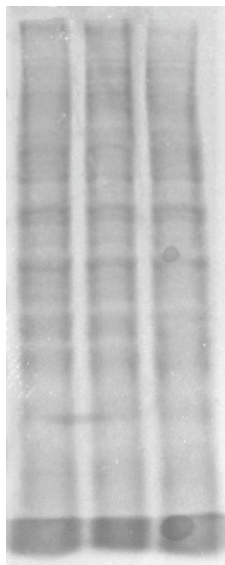

h) NF- $\kappa$ B & p-NF- $\kappa$ B

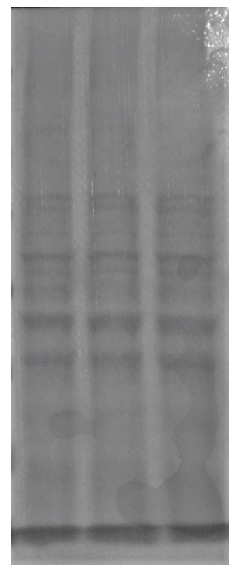

Supplement: s1 [file s1]
